# Supplementary material for: Distinct Clinicopathological Features and Prognostic Values of High-, Low-, or Non-Expressing HER2 Status in Colorectal Cancer
Source: MDPI journal article supplement (doi:10.3390/cancers15020554), 2023-01-16
Supplement: s1 [file s1]

Table S2. Baseline characteristics of HER2 IHC score 1 and HER2 IHC score 2

| Characteristics                                                       | Missing values | HER2 IHC<br>1 group,<br>n=648 | HER2 IHC<br>2 group,<br>n=383 | <i>P</i> |
|-----------------------------------------------------------------------|----------------|-------------------------------|-------------------------------|----------|
|                                                                       |                | No. (%)                       | No. (%)                       |          |
| Age, years                                                            |                |                               |                               |          |
| < 60                                                                  |                | 310 (47.8%)                   | 180 (47.0%)                   | 0.844    |
| ≥ 60                                                                  |                | 338 (52.2%)                   | 203 (53.0%)                   |          |
| Gender                                                                |                |                               |                               |          |
| Female                                                                |                | 252 (38.9%)                   | 154 (40.2%)                   | 0.724    |
| Male                                                                  |                | 396 (61.1%)                   | 229 (59.8%)                   |          |
| Grade of differentiation                                              |                |                               |                               |          |
| Well- or moderately                                                   |                | 578 (89.2%)                   | 347 (90.6%)                   | 0.541    |
| Poorly                                                                |                | 70 (10.8%)                    | 36 (9.4%)                     |          |
| Primary tumor site                                                    |                |                               |                               |          |
| Left (splenic flexure, descending colon, sigmoid colon, and rectum)   |                | 397 (61.3%)                   | 241 (62.9%)                   | 0.643    |
| Right (cecum, ascending colon, hepatic flexure, and transverse colon) |                | 251 (38.7%)                   | 142 (37.1%)                   |          |
| Rectal cancer                                                         |                |                               |                               |          |
| No                                                                    |                | 635 (98.0%)                   | 377 (98.4%)                   | 0.789    |
| Yes                                                                   |                | 13 (2.0%)                     | 6 (1.6%)                      |          |
| Initial bowel obstruction                                             |                |                               |                               |          |
| No                                                                    |                | 626 (96.6%)                   | 374 (97.7%)                   | 0.447    |
| Yes                                                                   |                | 22 (3.4%)                     | 9 (2.3%)                      |          |
| Vascular invasion and/or lymphatic infiltration                       |                |                               |                               |          |
| No                                                                    |                | 594 (91.7%)                   | 347 (90.6%)                   | 0.637    |
| Yes                                                                   |                | 54 (8.3%)                     | 36 (9.4%)                     |          |
| Perineural invasion                                                   |                |                               |                               |          |
| No                                                                    |                | 563 (86.9%)                   | 333 (86.9%)                   | 1.000    |
| Yes                                                                   |                | 85 (13.1%)                    | 50 (13.1%)                    |          |
| No. of lymph nodes excised                                            |                |                               |                               |          |
| < 12                                                                  |                | 70 (10.8%)                    | 48 (12.5%)                    | 0.458    |
| ≥ 12                                                                  |                | 578 (89.2%)                   | 335 (87.5%)                   |          |
| Pathologic T stage                                                    |                |                               |                               |          |
| T1-T3                                                                 |                | 531 (81.9%)                   | 304 (79.4%)                   | 0.350    |
| T4                                                                    |                | 117 (18.1%)                   | 79 (20.6%)                    |          |
| Lymph node metastasis                                                 |                |                               |                               |          |

|                        |             |             |       |
|------------------------|-------------|-------------|-------|
| No                     | 426 (65.7%) | 252 (65.8%) | 1.000 |
| Yes                    | 222 (34.3%) | 131 (34.2%) |       |
| Tumor deposit          |             |             |       |
| No                     | 533 (82.3%) | 315 (82.2%) | 1.000 |
| Yes                    | 115 (17.7%) | 68 (17.8%)  |       |
| Pathologic N stage     |             |             |       |
| N0                     | 393 (60.6%) | 227 (59.3%) | 0.710 |
| N1-2                   | 255 (39.4%) | 156 (40.7%) |       |
| Mismatch repair status |             |             |       |
| Proficient             | 566 (87.3%) | 336 (87.7%) | 0.935 |
| Deficient              | 82 (12.7%)  | 47 (12.3%)  |       |
| RAS/RAF mutation       |             |             |       |
| No                     | 176 (49.3%) | 117 (51.3%) | 0.696 |
| Yes                    | 181 (50.7%) | 111 (48.7%) |       |
| Missing values         | 446         |             |       |
| Neoadjuvant therapy    |             |             |       |
| No                     | 648 (100%)  | 383 (100%)  | NA    |
| Yes                    | 0 (0%)      | 0 (0%)      |       |
| Adjuvant therapy       |             |             |       |
| No                     | 332 (51.2%) | 194 (50.7%) | 0.908 |
| Yes                    | 316 (48.8%) | 189 (49.3%) |       |
