# Supplementary material for: Distinct Clinicopathological Features and Prognostic Values of High-, Low-, or Non-Expressing HER2 Status in Colorectal Cancer
Source: MDPI journal article supplement (doi:10.3390/cancers15020554), 2023-01-16
Supplement: s1 [file s1]

Table S1. Baseline characteristics of the four groups of HER2 expression

| Characteristics                                                       | Missing values | All the population, n=2768 | HER2 IHC 0 group, n=1680 | HER2 IHC 1 group, n=648 | HER2 IHC 2 group, n=383 | HER2 IHC 3 group, n=57 | <i>P</i> |
|-----------------------------------------------------------------------|----------------|----------------------------|--------------------------|-------------------------|-------------------------|------------------------|----------|
|                                                                       |                | No. (%)                    | No. (%)                  | No. (%)                 | No. (%)                 | No. (%)                |          |
| Age, years                                                            |                |                            |                          |                         |                         |                        |          |
| < 60                                                                  |                | 1325 (47.9%)               | 804 (47.9%)              | 310 (47.8%)             | 180 (47.0%)             | 31 (54.4%)             | 0.780    |
| ≥ 60                                                                  |                | 1443 (52.1%)               | 876 (52.1%)              | 338 (52.2%)             | 203 (53.0%)             | 26 (45.6%)             |          |
| Gender                                                                |                |                            |                          |                         |                         |                        |          |
| Female                                                                |                | 1125 (40.6%)               | 695 (41.4%)              | 252 (38.9%)             | 154 (40.2%)             | 24 (42.1%)             | 0.735    |
| Male                                                                  |                | 1643 (59.4%)               | 985 (58.6%)              | 396 (61.1%)             | 229 (59.8%)             | 33 (57.9%)             |          |
| Grade of differentiation                                              |                |                            |                          |                         |                         |                        |          |
| Well- or moderately                                                   |                | 2373 (85.7%)               | 1395 (83.0%)             | 578 (89.2%)             | 347 (90.6%)             | 53 (93.0%)             | <0.001   |
| Poorly                                                                |                | 395 (14.3%)                | 285 (17.0%)              | 70 (10.8%)              | 36 (9.4%)               | 4 (7.0%)               |          |
| Primary tumor site                                                    |                |                            |                          |                         |                         |                        |          |
| Left (splenic flexure, descending colon, sigmoid colon, and rectum)   |                | 1685 (60.9%)               | 1010 (60.1%)             | 397 (61.3%)             | 241 (62.9%)             | 37 (64.9%)             | 0.680    |
| Right (cecum, ascending colon, hepatic flexure, and transverse colon) |                | 1083 (39.1%)               | 670 (39.9%)              | 251 (38.7%)             | 142 (37.1%)             | 20 (35.1%)             |          |
| Rectal cancer                                                         |                |                            |                          |                         |                         |                        |          |
| No                                                                    |                | 2719 (98.2%)               | 1652 (98.3%)             | 635 (98.0%)             | 377 (98.4%)             | 55 (96.5%)             | 0.707    |
| Yes                                                                   |                | 49 (1.8%)                  | 28 (1.7%)                | 13 (2.0%)               | 6 (1.6%)                | 2 (3.5%)               |          |

|                                                 |              |              |             |             |            |        |
|-------------------------------------------------|--------------|--------------|-------------|-------------|------------|--------|
| Initial bowel obstruction                       |              |              |             |             |            |        |
| No                                              | 2631 (95.1%) | 1578 (93.9%) | 626 (96.6%) | 374 (97.7%) | 53 (93.0%) | 0.003  |
| Yes                                             | 137 (4.9%)   | 102 (6.1%)   | 22 (3.4%)   | 9 (2.3%)    | 4 (7.0%)   |        |
| Vascular invasion and/or lymphatic infiltration |              |              |             |             |            |        |
| No                                              | 2471 (89.3%) | 1483 (88.3%) | 594 (91.7%) | 347 (90.6%) | 47 (82.5%) | 0.028  |
| Yes                                             | 297 (10.7%)  | 197 (11.7%)  | 54 (8.3%)   | 36 (9.4%)   | 10 (17.5%) |        |
| Perineural invasion                             |              |              |             |             |            |        |
| No                                              | 2375 (85.8%) | 1440 (85.7%) | 563 (86.9%) | 333 (86.9%) | 39 (68.4%) | 0.002  |
| Yes                                             | 393 (14.2%)  | 240 (14.3%)  | 85 (13.1%)  | 50 (13.1%)  | 18 (31.6%) |        |
| No. of lymph nodes excised                      |              |              |             |             |            |        |
| < 12                                            | 284 (10.3%)  | 160 (9.5%)   | 70 (10.8%)  | 48 (12.5%)  | 6 (10.5%)  | 0.341  |
| ≥ 12                                            | 2484 (89.7%) | 1520 (90.5%) | 578 (89.2%) | 335 (87.5%) | 51 (89.5%) |        |
| Pathologic T stage                              |              |              |             |             |            |        |
| T1-T3                                           | 2349 (84.9%) | 1467 (87.3%) | 531 (81.9%) | 304 (79.4%) | 47 (82.5%) | <0.001 |
| T4                                              | 419 (15.1%)  | 213 (12.7%)  | 117 (18.1%) | 79 (20.6%)  | 10 (17.5%) |        |
| Lymph node metastasis                           |              |              |             |             |            |        |
| No                                              | 1770 (63.9%) | 1064 (63.3%) | 426 (65.7%) | 252 (65.8%) | 28 (49.1%) | 0.066  |
| Yes                                             | 998 (36.1%)  | 616 (36.7%)  | 222 (34.3%) | 131 (34.2%) | 29 (50.9%) |        |
| Tumor deposit                                   |              |              |             |             |            |        |
| No                                              | 2283 (82.5%) | 1394 (83.0%) | 533 (82.3%) | 315 (82.2%) | 41 (71.9%) | 0.194  |
| Yes                                             | 485 (17.5%)  | 286 (17.0%)  | 115 (17.7%) | 68 (17.8%)  | 16 (28.1%) |        |
| Pathologic N stage                              |              |              |             |             |            |        |
| N0                                              | 1622 (58.6%) | 977 (58.2%)  | 393 (60.6%) | 227 (59.3%) | 25 (43.9%) | 0.092  |
| N1-2                                            | 1146 (41.4%) | 703 (41.8%)  | 255 (39.4%) | 156 (40.7%) | 32 (56.1%) |        |

|                        |      |              |              |             |             |            |       |
|------------------------|------|--------------|--------------|-------------|-------------|------------|-------|
| Mismatch repair status |      |              |              |             |             |            |       |
| Proficient             |      | 2429 (87.8%) | 1472 (87.6%) | 566 (87.3%) | 336 (87.7%) | 55 (96.5%) | 0.243 |
| Deficient              |      | 339 (12.2%)  | 208 (12.4%)  | 82 (12.7%)  | 47 (12.3%)  | 2 (3.5%)   |       |
| RAS/RAF mutation       |      |              |              |             |             |            |       |
| No                     |      | 854 (49.4%)  | 528 (47.9%)  | 176 (49.3%) | 117 (51.3%) | 33 (80.5%) | 0.001 |
| Yes                    |      | 875 (50.6%)  | 575 (52.1%)  | 181 (50.7%) | 111 (48.7%) | 8 (19.5%)  |       |
| Missing values         | 1039 |              |              |             |             |            |       |
| Neoadjuvant therapy    |      |              |              |             |             |            |       |
| No                     |      | 2765 (99.9%) | 1677 (99.8%) | 648 (100%)  | 383 (100%)  | 57 (100%)  | 0.584 |
| Yes                    |      | 3 (0.1%)     | 3 (0.2%)     | 0 (0%)      | 0 (0%)      | 0 (0%)     |       |
| Adjuvant therapy       |      |              |              |             |             |            |       |
| No                     |      | 1377 (49.7%) | 828 (49.3%)  | 332 (51.2%) | 194 (50.7%) | 23 (40.4%) | 0.414 |
| Yes                    |      | 1391 (50.3%) | 852 (50.7%)  | 316 (48.8%) | 189 (49.3%) | 34 (59.6%) |       |

---
