# Supplementary material for: Distinct Clinicopathological Features and Prognostic Values of High-, Low-, or Non-Expressing HER2 Status in Colorectal Cancer
Source: MDPI journal article supplement (doi:10.3390/cancers15020554), 2023-01-16

Figure S1: Kaplan-Meier survival analysis for disease-free survival. Comparison of HER2-zero and HER2-high (a), HER2-low and HER2-high (b), HER2-zero and HER2-low (c) for cohorts after propensity score matching. p values are form the Cox proportional hazards regression model

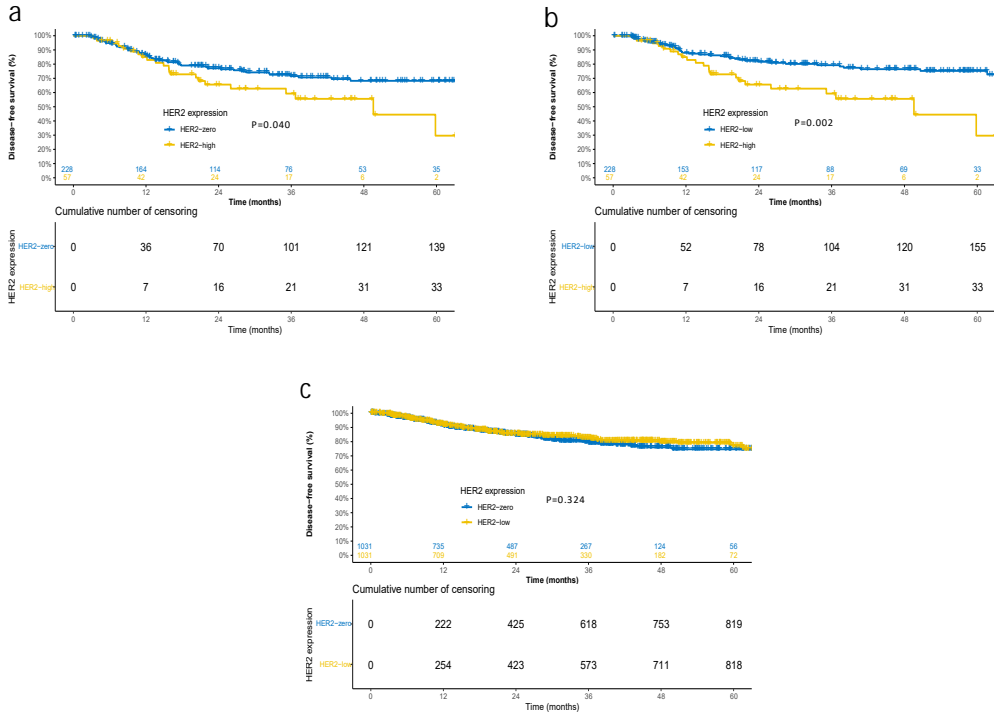

Supplement: s1 [file s1]
