# Supplementary material for: Distinct Clinicopathological Features and Prognostic Values of High-, Low-, or Non-Expressing HER2 Status in Colorectal Cancer
Source: MDPI journal article supplement (doi:10.3390/cancers15020554), 2023-01-16
Supplement: s1 [file s1]

Table S4. Selected baseline characteristics before and after propensity score matching in HER2-low and HER2-high group

| Characteristics                                 | No. (%)                |                       |          |                         | No. (%)               |                       |          |                         |
|-------------------------------------------------|------------------------|-----------------------|----------|-------------------------|-----------------------|-----------------------|----------|-------------------------|
|                                                 | Before matching        |                       | <i>P</i> | Standardized difference | After matching        |                       | <i>P</i> | Standardized difference |
|                                                 | HER2-low group, n=1031 | HER2-high group, n=57 |          |                         | HER2-low group, n=228 | HER2-high group, n=57 |          |                         |
| Age, years                                      |                        |                       |          |                         |                       |                       |          |                         |
| < 60                                            | 490 (47.5%)            | 31 (54.4%)            | 0.383    | 0.137                   | 125 (54.8%)           | 31 (54.4%)            | 1        | 0.009                   |
| ≥ 60                                            | 541 (52.5%)            | 26 (45.6%)            |          |                         | 103 (45.2%)           | 26 (45.6%)            |          |                         |
| Initial bowel obstruction                       |                        |                       |          |                         |                       |                       |          |                         |
| No                                              | 1000 (97.0%)           | 53 (93.0%)            | 0.199    | 0.183                   | 209 (91.7%)           | 53 (93.0%)            | 0.957    | 0.049                   |
| Yes                                             | 31 (3.0%)              | 4 (7.0%)              |          |                         | 19 (8.3%)             | 4 (7.0%)              |          |                         |
| Grade of differentiation                        |                        |                       |          |                         |                       |                       |          |                         |
| Well- or moderately                             | 925 (89.7%)            | 53 (93.0%)            | 0.569    | 0.116                   | 208 (91.2%)           | 53 (93.0%)            | 0.873    | 0.065                   |
| Poorly                                          | 106 (10.3%)            | 4 (7.0%)              |          |                         | 20 (8.8%)             | 4 (7.0%)              |          |                         |
| Pathologic T stage                              |                        |                       |          |                         |                       |                       |          |                         |
| T1-T3                                           | 835 (81.0%)            | 47 (82.5%)            | 0.919    | 0.038                   | 204 (89.5%)           | 47 (82.5%)            | 0.217    | 0.202                   |
| T4                                              | 196 (19.0%)            | 10 (17.5%)            |          |                         | 24 (10.5%)            | 10 (17.5%)            |          |                         |
| Vascular invasion and/or lymphatic infiltration |                        |                       |          |                         |                       |                       |          |                         |
| No                                              | 941 (91.3%)            | 47 (82.5%)            | 0.045    | 0.262                   | 199 (87.3%)           | 47 (82.5%)            | 0.464    | 0.134                   |
| Yes                                             | 90 (8.7%)              | 10 (17.5%)            |          |                         | 29 (12.7%)            | 10 (17.5%)            |          |                         |
| Perineural invasion                             |                        |                       |          |                         |                       |                       |          |                         |
| No                                              | 896 (86.9%)            | 39 (68.4%)            | <0.001   | 0.452                   | 157 (68.9%)           | 39 (68.4%)            | 1        | 0.009                   |
| Yes                                             | 135 (13.1%)            | 18 (31.6%)            |          |                         | 71 (31.1%)            | 18 (31.6%)            |          |                         |

|                            |              |            |       |       |             |            |       |        |
|----------------------------|--------------|------------|-------|-------|-------------|------------|-------|--------|
| Mismatch repair status     |              |            |       |       |             |            |       |        |
| Proficient                 | 902 (87.5%)  | 55 (96.5%) | 0.068 | 0.335 | 220 (96.5%) | 55 (96.5%) | 1     | <0.001 |
| Deficient                  | 129 (12.5%)  | 2 (3.5%)   |       |       | 8 (3.5%)    | 2 (3.5%)   |       |        |
| Lymph node metastasis      |              |            |       |       |             |            |       |        |
| No                         | 678 (65.8%)  | 28 (49.1%) | 0.016 | 0.340 | 122 (53.5%) | 28 (49.1%) | 0.656 | 0.087  |
| Yes                        | 353 (34.2%)  | 29 (50.9%) |       |       | 106 (46.5%) | 29 (50.9%) |       |        |
| Tumor deposit              |              |            |       |       |             |            |       |        |
| No                         | 848 (82.3%)  | 41 (71.9%) | 0.074 | 0.246 | 170 (74.6%) | 41 (71.9%) | 0.813 | 0.059  |
| Yes                        | 183 (17.7%)  | 16 (28.1%) |       |       | 58 (25.4%)  | 16 (28.1%) |       |        |
| No. of lymph nodes excised |              |            |       |       |             |            |       |        |
| < 12                       | 118 (11.4%)  | 6 (10.5%)  | 1.000 | 0.029 | 198 (86.8%) | 51 (89.5%) | 0.755 | 0.081  |
| ≥ 12                       | 913 (88.6%)  | 51 (89.5%) |       |       | 30 (13.2%)  | 6 (10.5%)  |       |        |
| Rectal cancer              |              |            |       |       |             |            |       |        |
| No                         | 1012 (98.2%) | 55 (96.5%) | 0.693 | 0.103 | 218 (95.6%) | 55 (96.5%) | 0.769 | 0.045  |
| Yes                        | 19 (1.8%)    | 2 (3.5%)   |       |       | 10 (4.4%)   | 2 (3.5%)   |       |        |
