# Supplementary material for: Distinct Clinicopathological Features and Prognostic Values of High-, Low-, or Non-Expressing HER2 Status in Colorectal Cancer
Source: MDPI journal article supplement (doi:10.3390/cancers15020554), 2023-01-16
Supplement: s1 [file s1]

Table S3. Selected baseline characteristics before and after propensity score matching in HER2-zero and HER2-high group

| Characteristics                                 | No. (%)                 |                       |          |                         | No. (%)                |                       |          |                         |
|-------------------------------------------------|-------------------------|-----------------------|----------|-------------------------|------------------------|-----------------------|----------|-------------------------|
|                                                 | Before matching         |                       | <i>P</i> | Standardized difference | After matching         |                       | <i>P</i> | Standardized difference |
|                                                 | HER2-zero group, n=1680 | HER2-high group, n=57 |          |                         | HER2-zero group, n=228 | HER2-high group, n=57 |          |                         |
| Age, years                                      |                         |                       |          |                         |                        |                       |          |                         |
| < 60                                            | 804 (47.9%)             | 31 (54.4%)            | 0.403    | 0.130                   | 123 (53.9%)            | 31 (54.4%)            | 1        | 0.009                   |
| ≥ 60                                            | 876 (52.1%)             | 26 (45.6%)            |          |                         | 105 (46.1%)            | 26 (45.6%)            |          |                         |
| Initial bowel obstruction                       |                         |                       |          |                         |                        |                       |          |                         |
| No                                              | 1578 (93.9%)            | 53 (93.0%)            | 0.990    | 0.038                   | 213 (93.4%)            | 53 (93.0%)            | 1        | 0.017                   |
| Yes                                             | 102 (6.1%)              | 4 (7.0%)              |          |                         | 15 (6.6%)              | 4 (7.0%)              |          |                         |
| Grade of differentiation                        |                         |                       |          |                         |                        |                       |          |                         |
| Well- or moderately                             | 1395 (83.0%)            | 53 (93.0%)            | 0.072    | 0.309                   | 217 (95.2%)            | 53 (93.0%)            | 0.74     | 0.093                   |
| Poorly                                          | 285 (17.0%)             | 4 (7.0%)              |          |                         | 11 (4.8%)              | 4 (7.0%)              |          |                         |
| Pathologic T stage                              |                         |                       |          |                         |                        |                       |          |                         |
| T1-T3                                           | 1467 (87.3%)            | 47 (82.5%)            | 0.380    | 0.135                   | 193 (84.6%)            | 47 (82.5%)            | 0.839    | 0.059                   |
| T4                                              | 213 (12.7%)             | 10 (17.5%)            |          |                         | 35 (15.4%)             | 10 (17.5%)            |          |                         |
| Vascular invasion and/or lymphatic infiltration |                         |                       |          |                         |                        |                       |          |                         |
| No                                              | 1483 (88.3%)            | 47 (82.5%)            | 0.260    | 0.164                   | 195 (85.5%)            | 47 (82.5%)            | 0.71     | 0.084                   |
| Yes                                             | 197 (11.7%)             | 10 (17.5%)            |          |                         | 33 (14.5%)             | 10 (17.5%)            |          |                         |
| Perineural invasion                             |                         |                       |          |                         |                        |                       |          |                         |
| No                                              | 1440 (85.7%)            | 39 (68.4%)            | 0.001    | 0.418                   | 147 (64.5%)            | 39 (68.4%)            | 0.686    | 0.084                   |
| Yes                                             | 240 (14.3%)             | 18 (31.6%)            |          |                         | 81 (35.5%)             | 18 (31.6%)            |          |                         |

|                            |              |            |       |       |             |            |       |       |
|----------------------------|--------------|------------|-------|-------|-------------|------------|-------|-------|
| Mismatch repair status     |              |            |       |       |             |            |       |       |
| Proficient                 | 1472 (87.6%) | 55 (96.5%) | 0.070 | 0.332 | 219 (96.1%) | 55 (96.5%) | 1     | 0.023 |
| Deficient                  | 208 (12.4%)  | 2 (3.5%)   |       |       | 9 (3.9%)    | 2 (3.5%)   |       |       |
| Lymph node metastasis      |              |            |       |       |             |            |       |       |
| No                         | 1064 (63.3%) | 28 (49.1%) | 0.041 | 0.288 | 122 (53.5%) | 28 (49.1%) | 0.656 | 0.088 |
| Yes                        | 616 (36.7%)  | 29 (50.9%) |       |       | 106 (46.5%) | 29 (50.9%) |       |       |
| Tumor deposit              |              |            |       |       |             |            |       |       |
| No                         | 1394 (83.0%) | 41 (71.9%) | 0.047 | 0.265 | 180 (78.9%) | 41 (71.9%) | 0.338 | 0.164 |
| Yes                        | 286 (17.0%)  | 16 (28.1%) |       |       | 48 (21.1%)  | 16 (28.1%) |       |       |
| No. of lymph nodes excised |              |            |       |       |             |            |       |       |
| < 12                       | 160 (9.5%)   | 6 (10.5%)  | 0.981 | 0.033 | 205 (89.9%) | 51 (89.5%) | 1     | 0.014 |
| ≥ 12                       | 1520 (90.5%) | 51 (89.5%) |       |       | 23 (10.1%)  | 6 (10.5%)  |       |       |
| Rectal cancer              |              |            |       |       |             |            |       |       |
| No                         | 1652 (98.3%) | 55 (96.5%) | 0.594 | 0.116 | 221 (96.9%) | 55 (96.5%) | 0.866 | 0.024 |
| Yes                        | 28 (1.7%)    | 2 (3.5%)   |       |       | 7 (3.1%)    | 2 (3.5%)   |       |       |

---
