# Supplementary material for: Distinct Clinicopathological Features and Prognostic Values of High-, Low-, or Non-Expressing HER2 Status in Colorectal Cancer
Source: MDPI journal article supplement (doi:10.3390/cancers15020554), 2023-01-16
Supplement: s1 [file s1]

Table S5. Selected baseline characteristics before and after propensity score matching in HER2-zero and HER2-low group

| Characteristics                                    | No. (%)                    |                           |          |                                | No. (%)                    |                           |          |                                |
|----------------------------------------------------|----------------------------|---------------------------|----------|--------------------------------|----------------------------|---------------------------|----------|--------------------------------|
|                                                    | Before matching            |                           | <i>P</i> | Standardi<br>zed<br>difference | After matching             |                           | <i>P</i> | Standardi<br>zed<br>difference |
|                                                    | HER2-zero<br>group, n=1680 | HER2-low<br>group, n=1031 |          |                                | HER2-zero<br>group, n=1031 | HER2-low<br>group, n=1031 |          |                                |
| Age, years                                         |                            |                           |          |                                |                            |                           |          |                                |
| < 60                                               | 804 (47.9%)                | 490 (47.5%)               | 0.898    | 0.007                          | 493 (47.8%)                | 490 (47.5%)               | 0.930    | 0.006                          |
| ≥ 60                                               | 876 (52.1%)                | 541 (52.5%)               |          |                                | 538 (52.2%)                | 541 (52.5%)               |          |                                |
| Initial bowel obstruction                          |                            |                           |          |                                |                            |                           |          |                                |
| No                                                 | 1578 (93.9%)               | 1000 (97.0%)              | <0.001   | 0.148                          | 1002 (97.2%)               | 1000 (97.0%)              | 0.896    | 0.012                          |
| Yes                                                | 102 (6.1%)                 | 31 (3.0%)                 |          |                                | 29 (2.8%)                  | 31 (3.0%)                 |          |                                |
| Grade of differentiation                           |                            |                           |          |                                |                            |                           |          |                                |
| Well- or moderately                                | 1395 (83.0%)               | 925 (89.7%)               | <0.001   | 0.196                          | 924 (89.6%)                | 925 (89.7%)               | 1.000    | 0.003                          |
| Poorly                                             | 285 (17.0%)                | 106 (10.3%)               |          |                                | 107 (10.4%)                | 106 (10.3%)               |          |                                |
| Pathologic T stage                                 |                            |                           |          |                                |                            |                           |          |                                |
| T1-T3                                              | 1467 (87.3%)               | 835 (81.0%)               | <0.001   | 0.174                          | 867 (84.1%)                | 835 (81.0%)               | 0.072    | 0.082                          |
| T4                                                 | 213 (12.7%)                | 196 (19.0%)               |          |                                | 164 (15.9%)                | 196 (19.0%)               |          |                                |
| Vascular invasion and/or<br>lymphatic infiltration |                            |                           |          |                                |                            |                           |          |                                |
| No                                                 | 1483 (88.3%)               | 941 (91.3%)               | 0.016    | 0.099                          | 937 (90.9%)                | 941 (91.3%)               | 0.817    | 0.014                          |
| Yes                                                | 197 (11.7%)                | 90 (8.7%)                 |          |                                | 94 (9.1%)                  | 90 (8.7%)                 |          |                                |
| Perineural invasion                                |                            |                           |          |                                |                            |                           |          |                                |
| No                                                 | 1440 (85.7%)               | 896 (86.9%)               | 0.415    | 0.035                          | 894 (86.7%)                | 896 (86.9%)               | 0.948    | 0.006                          |
| Yes                                                | 240 (14.3%)                | 135 (13.1%)               |          |                                | 137 (13.3%)                | 135 (13.1%)               |          |                                |

|                            |              |              |       |       |              |              |       |       |
|----------------------------|--------------|--------------|-------|-------|--------------|--------------|-------|-------|
| Mismatch repair status     |              |              |       |       |              |              |       |       |
| Proficient                 | 1472 (87.6%) | 902 (87.5%)  | 0.968 | 0.004 | 890 (86.3%)  | 902 (87.5%)  | 0.473 | 0.034 |
| Deficient                  | 208 (12.4%)  | 129 (12.5%)  |       |       | 141 (13.7%)  | 129 (12.5%)  |       |       |
| Lymph node metastasis      |              |              |       |       |              |              |       |       |
| No                         | 1064 (63.3%) | 678 (65.8%)  | 0.215 | 0.051 | 689 (66.8%)  | 678 (65.8%)  | 0.641 | 0.023 |
| Yes                        | 616 (36.7%)  | 353 (34.2%)  |       |       | 342 (33.2%)  | 353 (34.2%)  |       |       |
| Tumor deposit              |              |              |       |       |              |              |       |       |
| No                         | 1394 (83.0%) | 848 (82.3%)  | 0.665 | 0.019 | 862 (83.6%)  | 848 (82.3%)  | 0.447 | 0.036 |
| Yes                        | 286 (17.0%)  | 183 (17.7%)  |       |       | 169 (16.4%)  | 183 (17.7%)  |       |       |
| No. of lymph nodes excised |              |              |       |       |              |              |       |       |
| < 12                       | 160 (9.5%)   | 118 (11.4%)  | 0.125 | 0.063 | 912 (88.5%)  | 913 (88.6%)  | 1.000 | 0.003 |
| ≥ 12                       | 1520 (90.5%) | 913 (88.6%)  |       |       | 119 (11.5%)  | 118 (11.4%)  |       |       |
| Rectal cancer              |              |              |       |       |              |              |       |       |
| No                         | 1652 (98.3%) | 1012 (98.2%) | 0.850 | 0.013 | 1015 (98.4%) | 1012 (98.2%) | 0.609 | 0.023 |
| Yes                        | 28 (1.7%)    | 19 (1.8%)    |       |       | 16 (1.6%)    | 19 (1.8%)    |       |       |
